# Supplementary material for: Echocardiographic functional determinants of survival in heart failure with abnormal ejection fraction
Source: Frontiers journal article supplement (doi:10.3389/fcvm.2023.1290366), 2023-11-21
Supplement: Table_1.DOCX [file Table_1.DOCX]

**Table 1**: Clinical characteristics of the patients and main rest and stress findings

|  | **All patients**  **(1408 pts)** | **Ischemic HF**  **(743 pts)** | **Non-ischemic HF**  **(665 pts)** | **p-value** |
| --- | --- | --- | --- | --- |
| **Age (years)** | 65±11 | 67±10 | 65±14 | *<0.001* |
| **Sex, M/F, N (%)** | 1035 (73%)  373 (37%) | 592 (80%)  151 (20%) | 443 (67%)  222 (33%) | *<0.001* |
| **Type of stress:**  **Exercise N (%)**  **Vasodilator N (%)**  **Dobutamine N (%)** | 99 (7.0%)  1209 (85.9%)  100 (7.1%) | 13 (2.0%)  605 (91.0%)  47 (7.0%) | 86 (11.6%)  604 (81.3%)  53 (7.1%) | *<0.001* |
| **Hypertensive patients N (%)** | 945 (67%) | 550 (74%) | 395 (59%) | *<0.001* |
| **Diabetic patients**  **N (%)** | 480 (34%) | 277 (37%) | 203 (30%) | *0.008* |
| **LBBB N (%)** | 369 (26%) | 93 (13%) | 276 (42%) | *<0.001* |
| **Previous myocardial infarction, N (%)** | 608 (43%) | 608 (81%) | 0 |  |
| **Previous PCI/**  **CABG, N (%)** | 639 (45%) | 639 (86%) | 0 |  |
| **Beta blockers, N (%)** | 836 (59.4%) | 439 (59.1%) | 397 (59.7%) | *0.815* |
| **Rest SBP (mmHg)** | 130±19 | 130±19 | 130±20 | *0.718* |
| **Rest DBP (mmHg)** | 77±12 | 78±11 | 76±13 | *0.020* |
| **Rest HR (bpm)** | 70±12 | 67±11 | 72±12 | *<0.001* |
| **Stress HR (bpm)** | 92±20 | 93±22 | 90±10 | *0.052* |
| **Rest WMSI** | 1.67±0.45 | 1.64±0.41 | 1.70±0.49 | *<0.001* |
| **Stress WMSI** | 1.64±0.46 | 1.67±0.44 | 1.62±0.47 | *<0.001* |
| **DWMSI (stress-rest)** | -0.03±0.24 | 0.02±0.23 | -0.08±0.24 | *<0.001* |
| **LVCR, N (%)** | 169 (12%) | 49 (7%) | 120 (18%) | *<0.001* |
| **Stress-induced ischemia, N (%)** | 224 (17%) | 168 (23%) | 76 (11%) | *<0.001* |
| **Rest LV EF (%)** | 39±17 | 41±6 | 38±8 | *<0.001* |
| **Rest CVF of LAD (cm/s)** | 33.5±15.4 | 32.2±14.3 | 35.1±16.8 | *<0.001* |
| **High CFV, N (%)** | 662 (47%) | 312 (42%) | 350 (53%) | *<0.001* |
| **CFVR of LAD** | 2.02±0.53 | 2.00±0.56 | 2.05±0.51 | *0.089* |
| **Reduced CFVR,**  **N (%)** | 725 (51%) | 338 (52%) | 337 (51%) | *0.563* |

Abbreviations. LBBB: left bundle branch block; PCI: percutaneous coronary intervention; CABG: coronary artery by-pass grafting; SBP: systolic blood pressure; DBP: diastolic blood pressure; HR: heart rate, bpm: beats per minute.WMSI: wall motion score index; LVCR: left ventricular contractile reserve; EF: ejection fraction; CVF: coronary flow velocity; LAD: left anterior descending coronary artery; CFVR : coronary flow velocity reserve
