# Supplementary material for: Echocardiographic functional determinants of survival in heart failure with abnormal ejection fraction
Source: Frontiers journal article supplement (doi:10.3389/fcvm.2023.1290366), 2023-11-21
Supplement: Table_2.DOCX [file Table_2.DOCX]

**Table 2.** Predictors of all-cause mortality.

|  | **Univariable Logistic**  **Regression Analysis** | | **Multivariable Logistic Regression Analysis** | |
| --- | --- | --- | --- | --- |
| **Variables** | **HR (95%CI)** | ***p*** | **HR (95%CI)** | ***p*** |
| Age (*years*) | 1.062 (1.047-1.077) | *<0.001* | 1.051 (1.037-1.066) | *<0.001* |
| Sex (*male*) | 1.203 (0.903-1.603) | *0.207* |  |  |
| Hypertensive patients | 1.189 (0.913-1.548) | *0.198* |  |  |
| Beta-blockers therapy | 1.170 (0.912-1.502) | *0.217* |  |  |
| Diabetic patients | 1.222 (0.950-1.571) | *0.118* |  |  |
| Prior MI | 1.037 (0.808-1.332) | *0.775* |  |  |
| LV EF (%) | 0.956 (0.943-0.968) | *<0.001* | 0.961 (0.946-0.976) | *<0.001* |
| CFV of LAD ≥32 cm/s | 2.407 (1.871-3.096) | *<0.001* | 1.748 (1.345-2.270) | *<0.001* |
| CFVR of LAD ≤2.0 | 3.908 (2.903-5.250) | *<0.001* | 2.314 (1.685-3.179) | *<0.001* |
| LVCR | 0.524 (0.324-0.847) | *<0.001* | 0.507 (0.302-0.851) | *0.010* |
| Stress-induced ischemia | 2.223 (1.642-3.009) | *<0.001* | 1.925 (1.404-2.638) | *<0.001* |
| TTE-SE score=0 | 1 |  | 1 |  |
| TTE-SE score=1 | 1.516 (0.464-4.952) | *0.491* |  |  |
| TTE-SE score =2 | 2.968 (0.932-9.444) | *0.066* |  |  |
| TTE-SE score =3 | 6.174 (1.952-19.552) | *0.002* |  |  |
| TTE-SE score =4 | 12.958 (4.055-41.399) | *<0.001* |  |  |
| TTE-SE score =5 | 30.689 (8.113-116.056) | *<0.001* |  |  |

MI: myocardial infarction; LV EF: left ventricular ejection fraction; LVCR: left ventricular contractile reserve; EF: ejection fraction; CVF: coronary flow velocity; LAD: left anterior descending coronary artery; CFVR : coronary flow velocity reserve; TTE -SE: trans-thoracic stress echo
